# Supplementary material for: Effects of Anthropogenic Disturbance and Climate on Patterns of Bat Fly Parasitism
Source: PubMed Central journal article supplement (PMC3400619; doi:10.1371/journal.pone.0041487), 2012-07-19
Supplement: pone.0041487.s003.pdf [file pone.0041487.s003.pdf]

**Table S2.** Comparison of models used to test the effect of climate and disturbance on fly abundance per host species in four species of bats in the Smithsonian Venezuela Project data set.

| Model                         |                 | $\Delta$ |                |        |       |                |
|-------------------------------|-----------------|----------|----------------|--------|-------|----------------|
| ranks                         | Model structure | K        | R <sup>2</sup> | AIC    | AIC   | w <sub>i</sub> |
| <i>Artibeus planirostris</i>  |                 |          |                |        |       |                |
| 1 <sup>a</sup>                | PC1+PC2+HPE     | 6        | 0.016          | 3386.1 | 0.0   | 98.37          |
| 2                             | PC2             | 4        | 0.007          | 3395.2 | 9.1   | 1.06           |
| 3                             | PC1+PC2         | 5        | 0.007          | 3396.8 | 10.6  | 0.48           |
| 4                             | HPE             | 4        | 0.002          | 3401.4 | 15.3  | 0.05           |
| 5 <sup>b</sup>                | 1               | 3        | 0              | 3402.7 | 16.6  | 0.02           |
| 6                             | PC1             | 4        | 0.001          | 3403.4 | 17.3  | 0.02           |
| <i>Carollia perspicillata</i> |                 |          |                |        |       |                |
| 1 <sup>a</sup>                | PC1+PC2+HPE     | 6        | 0.076          | 7666.3 | 0.0   | 88.48          |
| 2                             | PC1+PC2         | 5        | 0.074          | 7670.4 | 4.1   | 11.52          |
| 3                             | PC2             | 4        | 0.041          | 7776.5 | 110.1 | 0              |
| 4                             | HPE             | 4        | 0.028          | 7818.3 | 151.9 | 0              |
| 5                             | PC1             | 4        | 0.026          | 7823.8 | 157.5 | 0              |
| 6 <sup>b</sup>                | 1               | 3        | 0              | 7902.9 | 236.6 | 0              |
| <i>Desmodus rotundus</i>      |                 |          |                |        |       |                |
| 1                             | PC1+PC2         | 5        | 0.033          | 4248.7 | 0.0   | 64.96          |
| 2 <sup>a</sup>                | PC1+PC2+HPE     | 6        | 0.034          | 4250.0 | 1.2   | 34.99          |
| 3                             | PC2             | 4        | 0.011          | 4263.8 | 15.1  | 0.04           |
| 4                             | PC1             | 4        | 0.005          | 4268.1 | 19.4  | 0              |
| 5 <sup>b</sup>                | 1               | 3        | 0              | 4270.3 | 21.6  | 0              |

|                             |             |   |       |        |      |       |
|-----------------------------|-------------|---|-------|--------|------|-------|
| 6                           | HPE         | 4 | 0     | 4272.1 | 23.4 | 0     |
| <i>Pteronotus parnellii</i> |             |   |       |        |      |       |
| 1 <sup>a</sup>              | PC1+PC2+HPE | 6 | 0.137 | 1830.7 | 0.0  | 92.93 |
| 2                           | PC1+PC2     | 5 | 0.118 | 1836.1 | 5.4  | 6.26  |
| 3                           | PC1         | 4 | 0.102 | 1840.2 | 9.5  | 0.81  |
| 4                           | PC2         | 4 | 0.011 | 1873.3 | 42.7 | 0     |
| 5                           | HPE         | 4 | 0.01  | 1873.7 | 43.0 | 0     |
| 6 <sup>b</sup>              | 1           | 3 | 0     | 1875.3 | 44.6 | 0     |

---

Models are ranked from the most supported (best model) to the least supported according to Akaike information criteria (AIC).  $\Delta$  AIC – difference in AIC between the current and best model;  $w_i$  – model probabilities. K –number of parameters in the model. Note that the number of parameters includes  $k$ , which is the dispersion parameter of the negative binomial distribution (see Protocol S1 for details). PC1 and PC2 – principal components of the seven environmental variables; HPE – Human population density estimate (see Methods in main text for details).

<sup>a</sup> Global model; <sup>b</sup> Null model
